# Supplementary material for: Blue light-induced low mechanical stability of ruthenium-based coordination bonds: an AFM-based single-molecule force spectroscopy study
Source: Royal Society of Chemistry journal article supplement (doi:10.1039/d0ra07274e), 2020-01-01
Supplement: d0ra07274e1.pdf [file d0ra07274e1.pdf]

## Supplementary Information

### Blue light-induced low mechanical stability of Ruthenium-based coordination bonds: an AFM-based single-molecule force spectroscopy study

Mohd. Muddassir\*

Department of Chemistry, College of Science, King Saud University, Riyadh 11451,  
Saudi Arabia.

Corresponding Author Email: [mmohammadarshad@ksu.edu.sa](mailto:mmohammadarshad@ksu.edu.sa);  
muddassirchem@gmail.com

#### Table of Contents

Supporting Tables

**Table S1** Selected bond lengths (Å) and angles (°) for [(bpy)<sub>2</sub>Ru(4-pyNH<sub>2</sub>)<sub>2</sub>](PF<sub>6</sub>)<sub>2</sub>

**Table S2** Selected bond lengths (Å) and angles (°) for [(bpy)<sub>2</sub>Ru(4-pyNH<sub>2</sub>)<sub>2</sub>](PF<sub>6</sub>)<sub>2</sub>

Supporting Figures

**Figure S1** X-Ray Crystal structure of [(bpy)<sub>2</sub>Ru(4-pyNH<sub>2</sub>)<sub>2</sub>](PF<sub>6</sub>)<sub>2</sub>, thermal ellipsoids are drawn at 30% probability level. Remaining H-atoms, and counter ions have been omitted for clarity.

**Figure S2(A)** <sup>1</sup>HNMR spectrum of [(bpy)<sub>2</sub>Ru(4-pyNH<sub>2</sub>)<sub>2</sub>](PF<sub>6</sub>)<sub>2</sub> complex.

**Figure S2(B)** <sup>1</sup>HNMR spectrum of HA- Ru<sup>II</sup> complex. The ratio between Ru complex and sugar rings of the HA polymer is estimated ~22%.

**Figure S3(A)** IR spectrum of [(bpy)<sub>2</sub>Ru(4-pyNH<sub>2</sub>)<sub>2</sub>](PF<sub>6</sub>)<sub>2</sub> complex.

**Figure S3(B)** IR spectrum of HA- Ru<sup>II</sup> complex.

**Figure S4** UV-Vis spectrum of A) [(bpy)<sub>2</sub>Ru(4-pyNH<sub>2</sub>)<sub>2</sub>](PF<sub>6</sub>)<sub>2</sub> (in acetonitrile); B) HA- Ru<sup>II</sup> complex (in water).

**Figure S5** Emission spectrum of A)  $[(bpy)_2Ru(4-pyNH_2)_2](PF_6)_2$  (in acetonitrile); B) **HA- Ru<sup>II</sup>** complex (in water).

**Figure S6** Representative single-molecule force curves obtained from the control experiments. (a) No saw-tooth peaks were observed for the stretching of unmodified HA. (b) If no molecules were picked up, the approach and retrace traces typically overlap with each other.

**Figure S7** Representative single-molecule force curves obtained from the control experiments. HA-4-Iminopyridine. No saw-tooth peaks were observed. Red lines correspond to WLC fitting.

**Figure S8** The distributions of the persistence lengths of HA measured in the “multiple fishhooks” approach. A) Persistence lengths for force-extension traces obtained on **HA- Ru<sup>II</sup>** complex under normal condition (in black); B) Persistence lengths for force-extension traces obtained on **HA- Ru<sup>II</sup>** complex in continuous blue light illumination (in blue).

Table S1 Crystal structural data and refinement parameters for complexes [(bpy)<sub>2</sub>Ru(4-pyNH<sub>2</sub>)<sub>2</sub>](PF<sub>6</sub>)<sub>2</sub>

| <b>1</b>                                  |                                                                                  |
|-------------------------------------------|----------------------------------------------------------------------------------|
| CCDC No.                                  | CCDC 1416079                                                                     |
| Formula                                   | C <sub>30</sub> H <sub>28</sub> N <sub>8</sub> Ru(PF <sub>6</sub> ) <sub>2</sub> |
| Formula weight                            | 891.61                                                                           |
| Temperature / K                           | 293                                                                              |
| Crystal system                            | Triclinic                                                                        |
| Space group                               | <i>P</i> -1                                                                      |
| <i>a</i> / Å                              | <u>10.768 (4)</u>                                                                |
| <i>b</i> / Å                              | <u>11.890 (4)</u>                                                                |
| <i>c</i> / Å                              | <u>16.120 (6)</u>                                                                |
| <i>α</i> / °                              | <u>104.401 (5)</u>                                                               |
| <i>β</i> / °                              | <u>98.576 (6)</u>                                                                |
| <i>γ</i> / °                              | <u>108.158 (5)</u>                                                               |
| Volume / Å <sup>3</sup>                   | <u>1841.1 (11)</u>                                                               |
| <i>Z</i>                                  | 2                                                                                |
| <i>μ</i> / mm <sup>-1</sup>               | 0.61                                                                             |
| <i>F</i> (000)                            | 892                                                                              |
| Crystal size / mm <sup>3</sup>            | 0.26×0.23×0.19                                                                   |
| Index ranges                              | -12 ≤ <i>h</i> ≤ 12<br>-14 ≤ <i>k</i> ≤ 14<br>-19 ≤ <i>l</i> ≤ 19                |
| Reflections collected                     | 12100                                                                            |
| Independent reflections                   | 6290 [ <i>R</i> (int) = 0.092]                                                   |
| Data/restraints/parameters                | 6290/0/454                                                                       |
| Goodness-of-fit on <i>F</i> <sup>2</sup>  | 1.23                                                                             |
| Final <i>R</i> indexes [all data]         | <i>R</i> <sub>1</sub> = 0.1384, <i>wR</i> <sub>2</sub> = 0.3835                  |
| Largest diff. peak/hole/e Å <sup>-3</sup> | 1.75/-3.07                                                                       |

<sup>a</sup>  $R_1 = (\sum ||F_o| - |F_c||) / \sum |F_o|$ . <sup>b</sup>  $wR_2 = [\sum [w(F_o^2 - F_c^2)^2] / \sum [w(F_o^2)^2]]^{1/2}$ , where  $w = 1 / [\sigma^2(F_o^2) + (\alpha P)^2 + bP]$ .

Table S2 Selected bond lengths (Å) and angles (°) for **[(bpy)<sub>2</sub>Ru(4-pyNH<sub>2</sub>)<sub>2</sub>](PF<sub>6</sub>)<sub>2</sub>**

|     |     |    |            |
|-----|-----|----|------------|
| Ru1 | N6  |    | 2.017(5)   |
| Ru1 | N1  |    | 2.042(4)   |
| Ru1 | N3  |    | 2.053(4)   |
| Ru1 | N7  |    | 2.054(4)   |
| Ru1 | N5  |    | 2.091(4)   |
| Ru1 | N2  |    | 2.108(4)   |
| N6  | Ru1 | N1 | 77.94(17)  |
| N6  | Ru1 | N3 | 96.84(17)  |
| N1  | Ru1 | N3 | 171.81(17) |
| N6  | Ru1 | N7 | 88.27(16)  |
| N1  | Ru1 | N7 | 94.64(15)  |
| N3  | Ru1 | N7 | 78.78(16)  |
| N6  | Ru1 | N5 | 175.81(16) |
| N1  | Ru1 | N5 | 98.23(17)  |
| N3  | Ru1 | N5 | 86.78(17)  |
| N7  | Ru1 | N5 | 90.36(15)  |
| N6  | Ru1 | N2 | 89.84(16)  |
| N1  | Ru1 | N2 | 87.61(15)  |
| N3  | Ru1 | N2 | 98.77(16)  |
| N7  | Ru1 | N2 | 176.70(16) |
| N5  | Ru1 | N2 | 91.71(15)  |

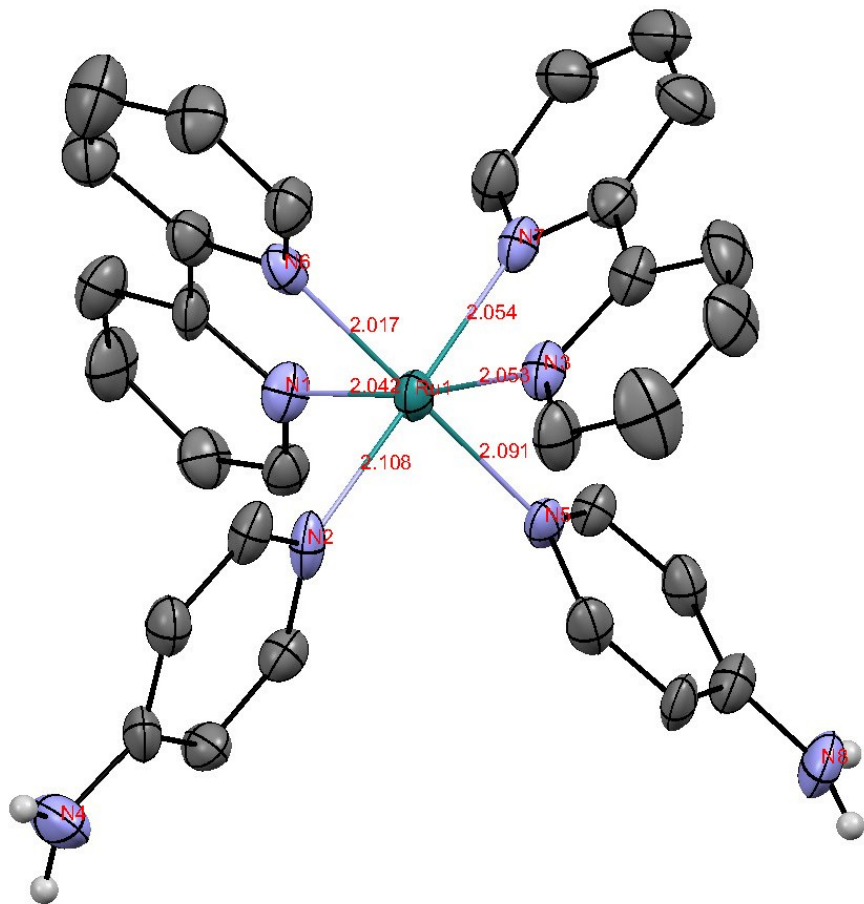

Figure S1

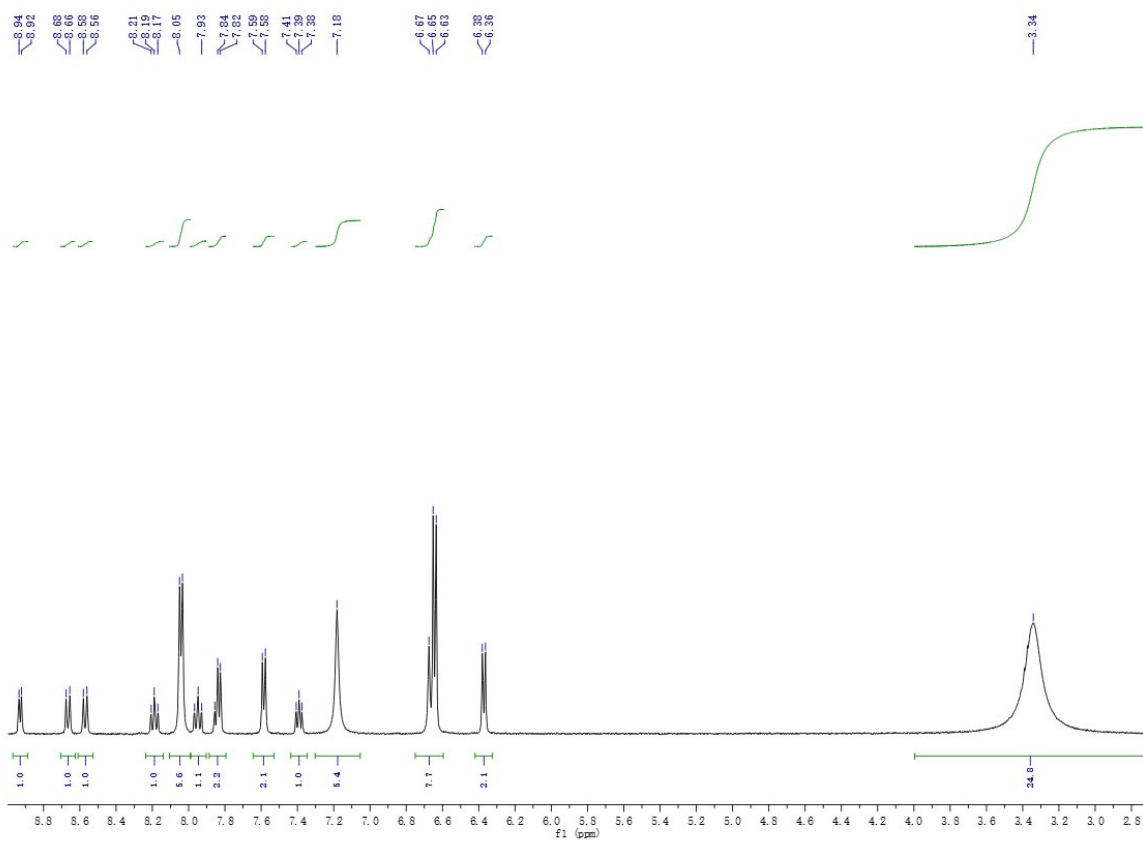

Figure S2(A)-.

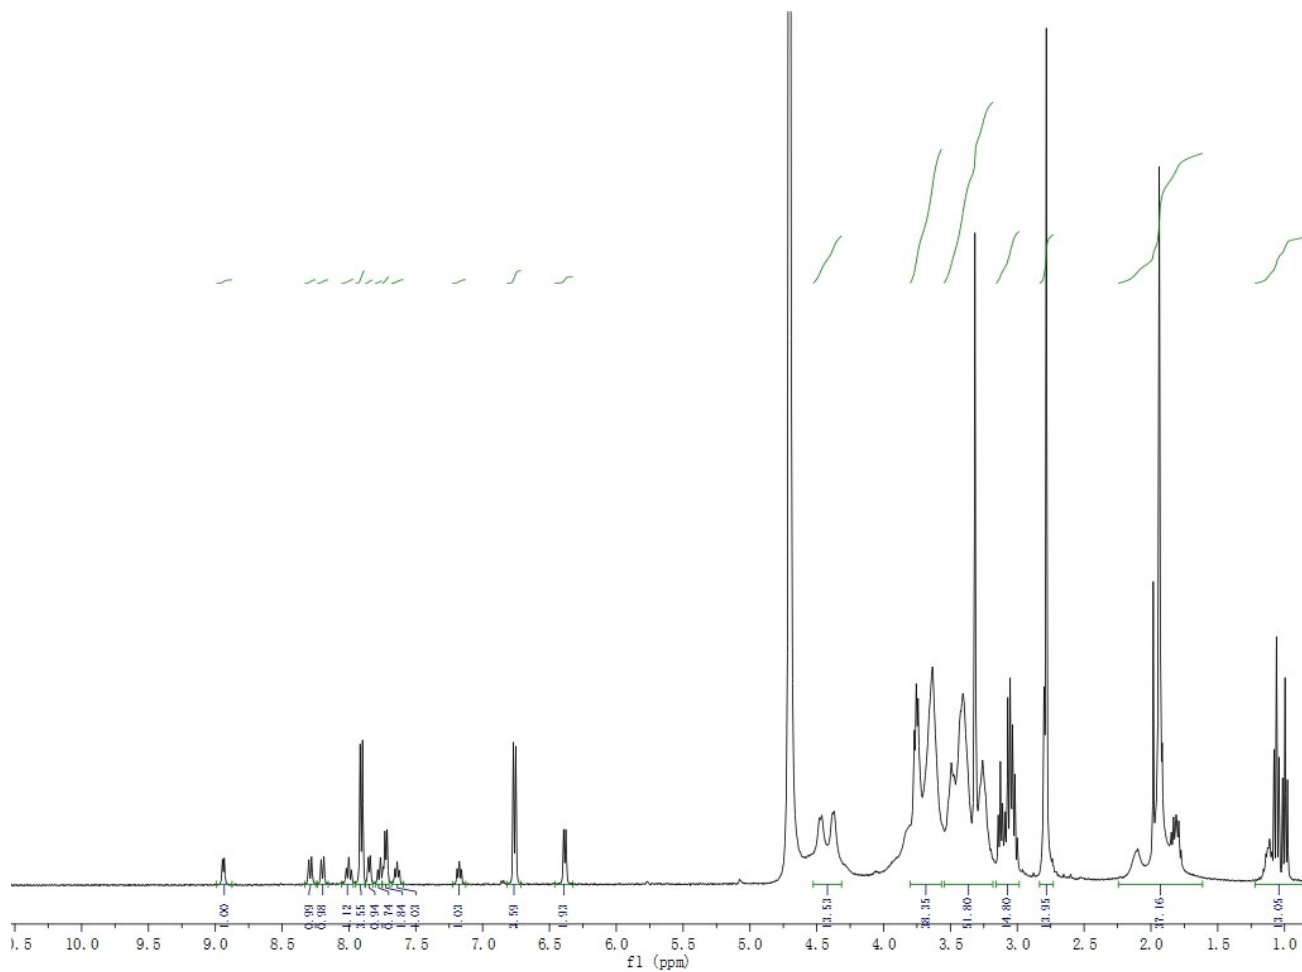

Figure S2(B)

Resonances at aromatic region (6.4-8.9ppm) verified the presence of Ru<sup>II</sup> complex, and their integrated ratios were compared with that of the N-acetyl glucosamine proton peak of native HA, appearing at ~1.9 ppm

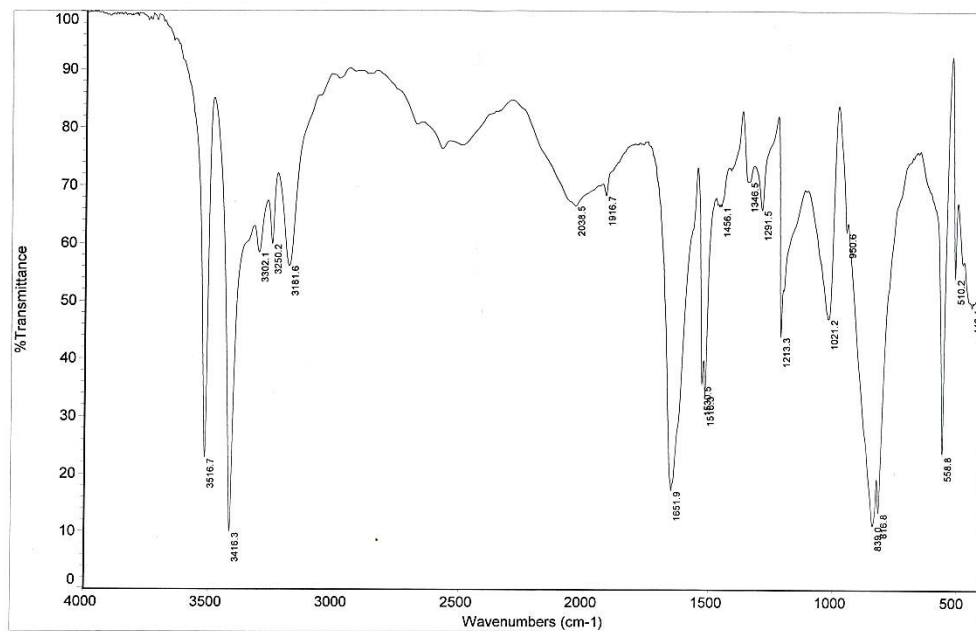

Figure S3(A)

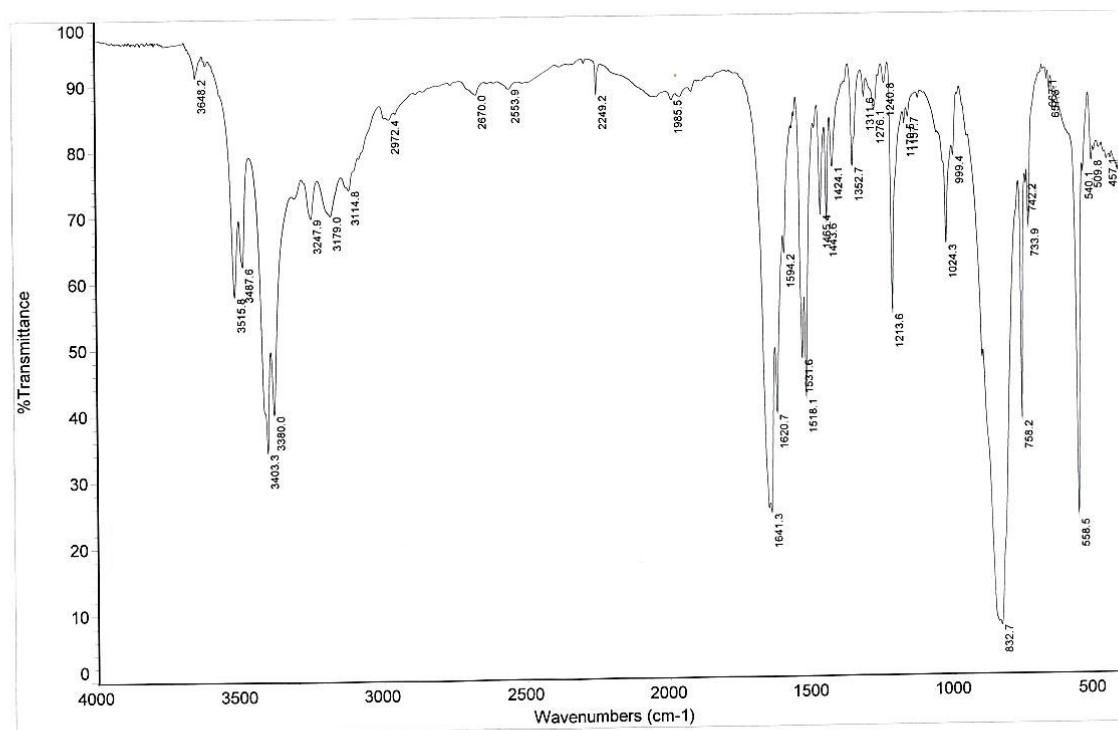

Figure S3(B)



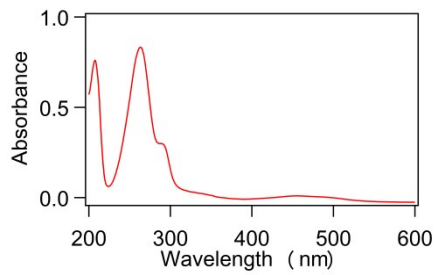

(A)

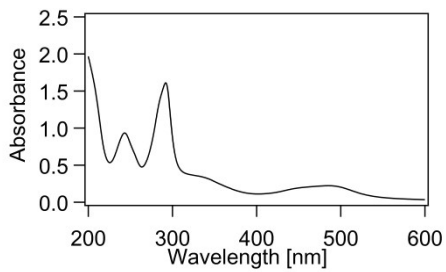

(B)

Figure S4

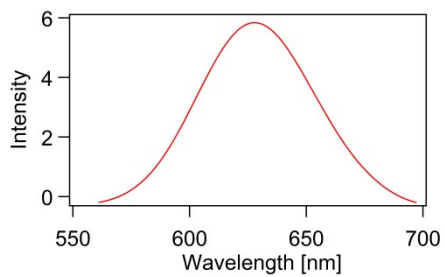

(A)

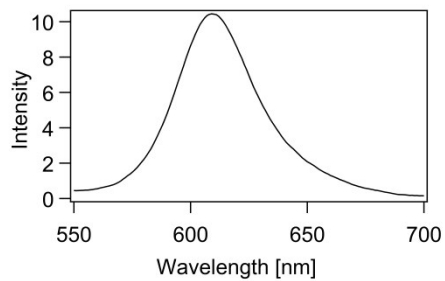

(B)

Figure S5

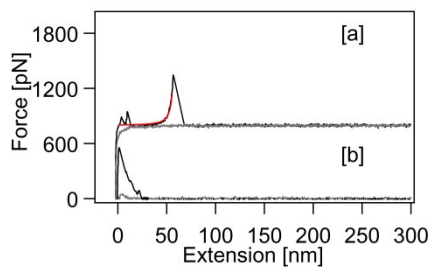

Figure S6

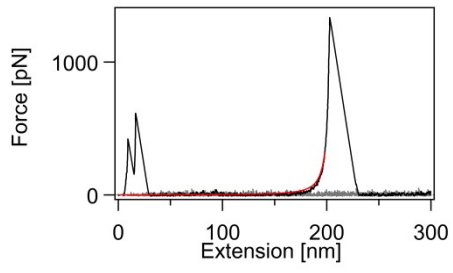

Figure S7

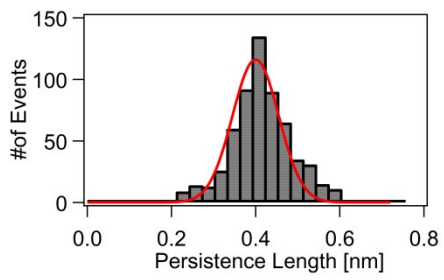

(A)

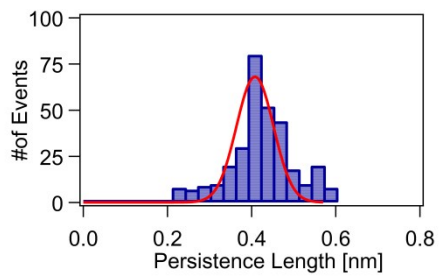

(B)

Figure S8
